# Supplementary material for: Enhancement of third-order optical nonlinearity of VSe2 by hybridizing with CoSe2 as flower-like nanoparticles
Source: Royal Society of Chemistry journal article supplement (doi:10.1039/d4ra04192e), 2024-01-01
Supplement: d4ra04192e6.pdf [file d4ra04192e6.pdf]

## **Enhancement of Third-order Optical Nonlinearity of VSe<sub>2</sub> via Hybridizing with CoSe<sub>2</sub> as Flower-like Nanoparticles**

Marziyeh Parishani<sup>a</sup>, Marzieh Nadafan<sup>b</sup>\* and Sajad Akbarpoor<sup>b</sup>

*Department of Physics, Tarbiat Modares University, Tehran, P. O. Box 14115-175, I.R. Iran*

*Department of Physics, Shahid Rajaei Teacher Training University, Tehran, P. O. Box 16788-15811, I.R. Iran*

*\* E-mail: Corresponding Author: M. Nadafan (m.nadafan@sru.ac.ir, m\_naddafan@yahoo.com).*

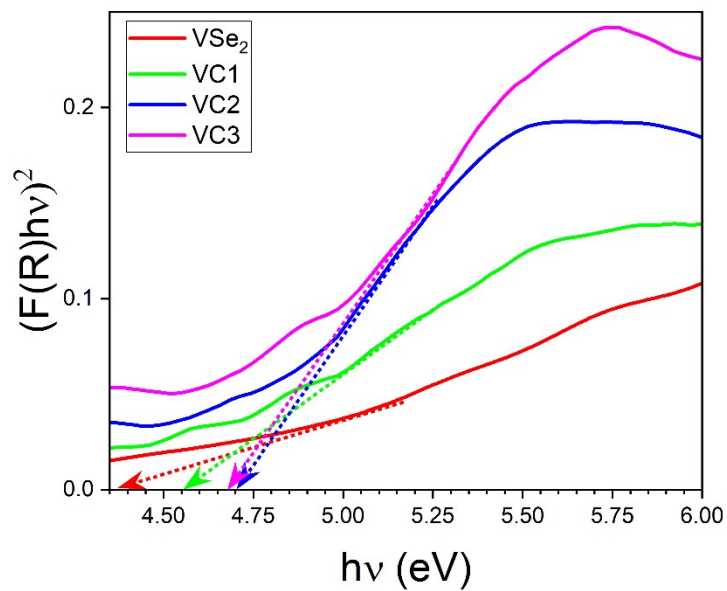

Figure S 1. Tauc plots of fabricated Pristine VSe<sub>2</sub> and nanohybrids of VSe<sub>2</sub>-CoSe<sub>2</sub>

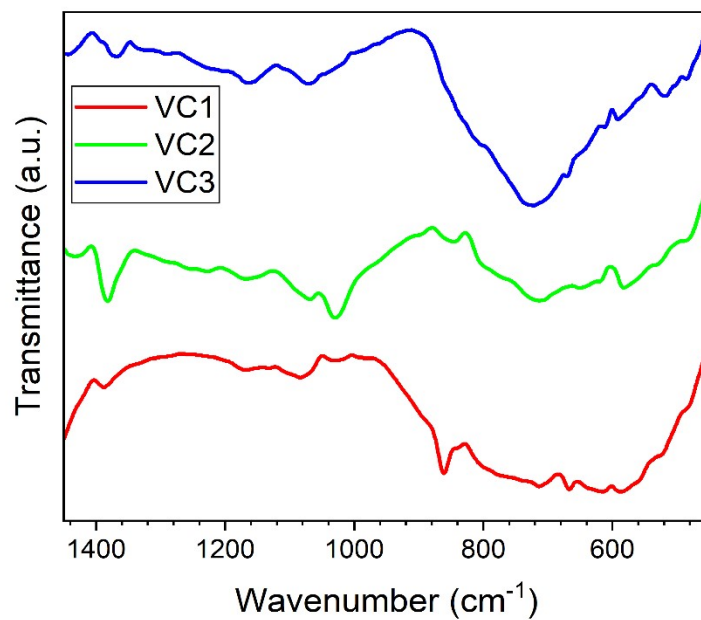

Figure S 2. FTIR spectra of all nanohybrids of VSe<sub>2</sub>-CoSe<sub>2</sub>

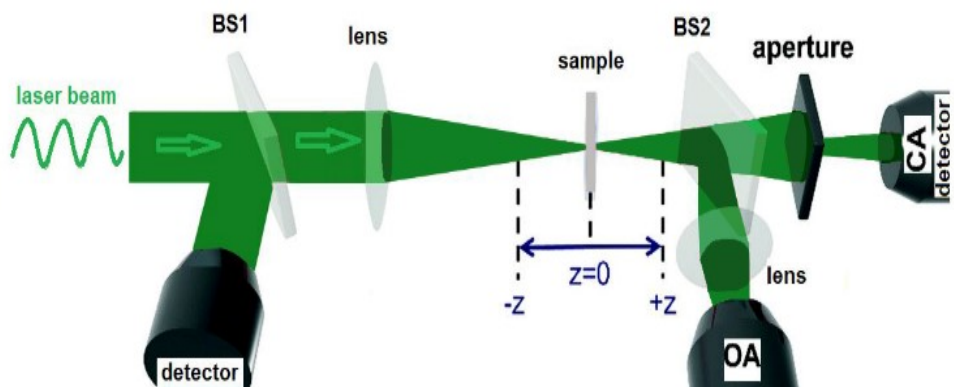

Figure S 3. Experimental Z-scan setup

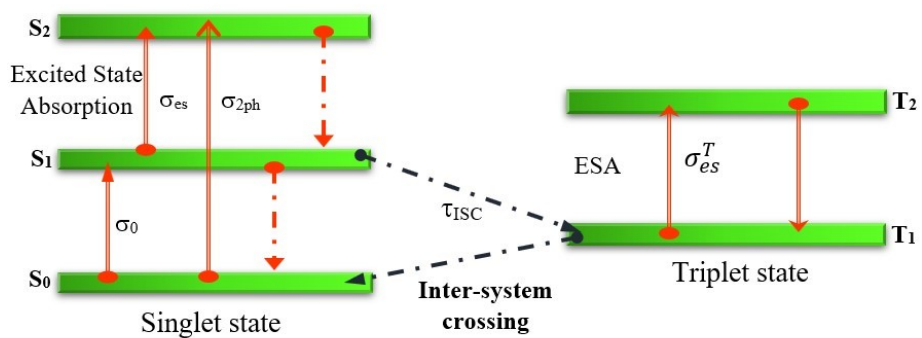

Figure S 4. Schematic diagram of 5-state electron transition theory
