# Supplementary figures and images for: Enhancement of third-order optical nonlinearity of VSe2 by hybridizing with CoSe2 as flower-like nanoparticles
Source: Royal Society of Chemistry journal article supplement (doi:10.1039/d4ra04192e), 2024-01-01

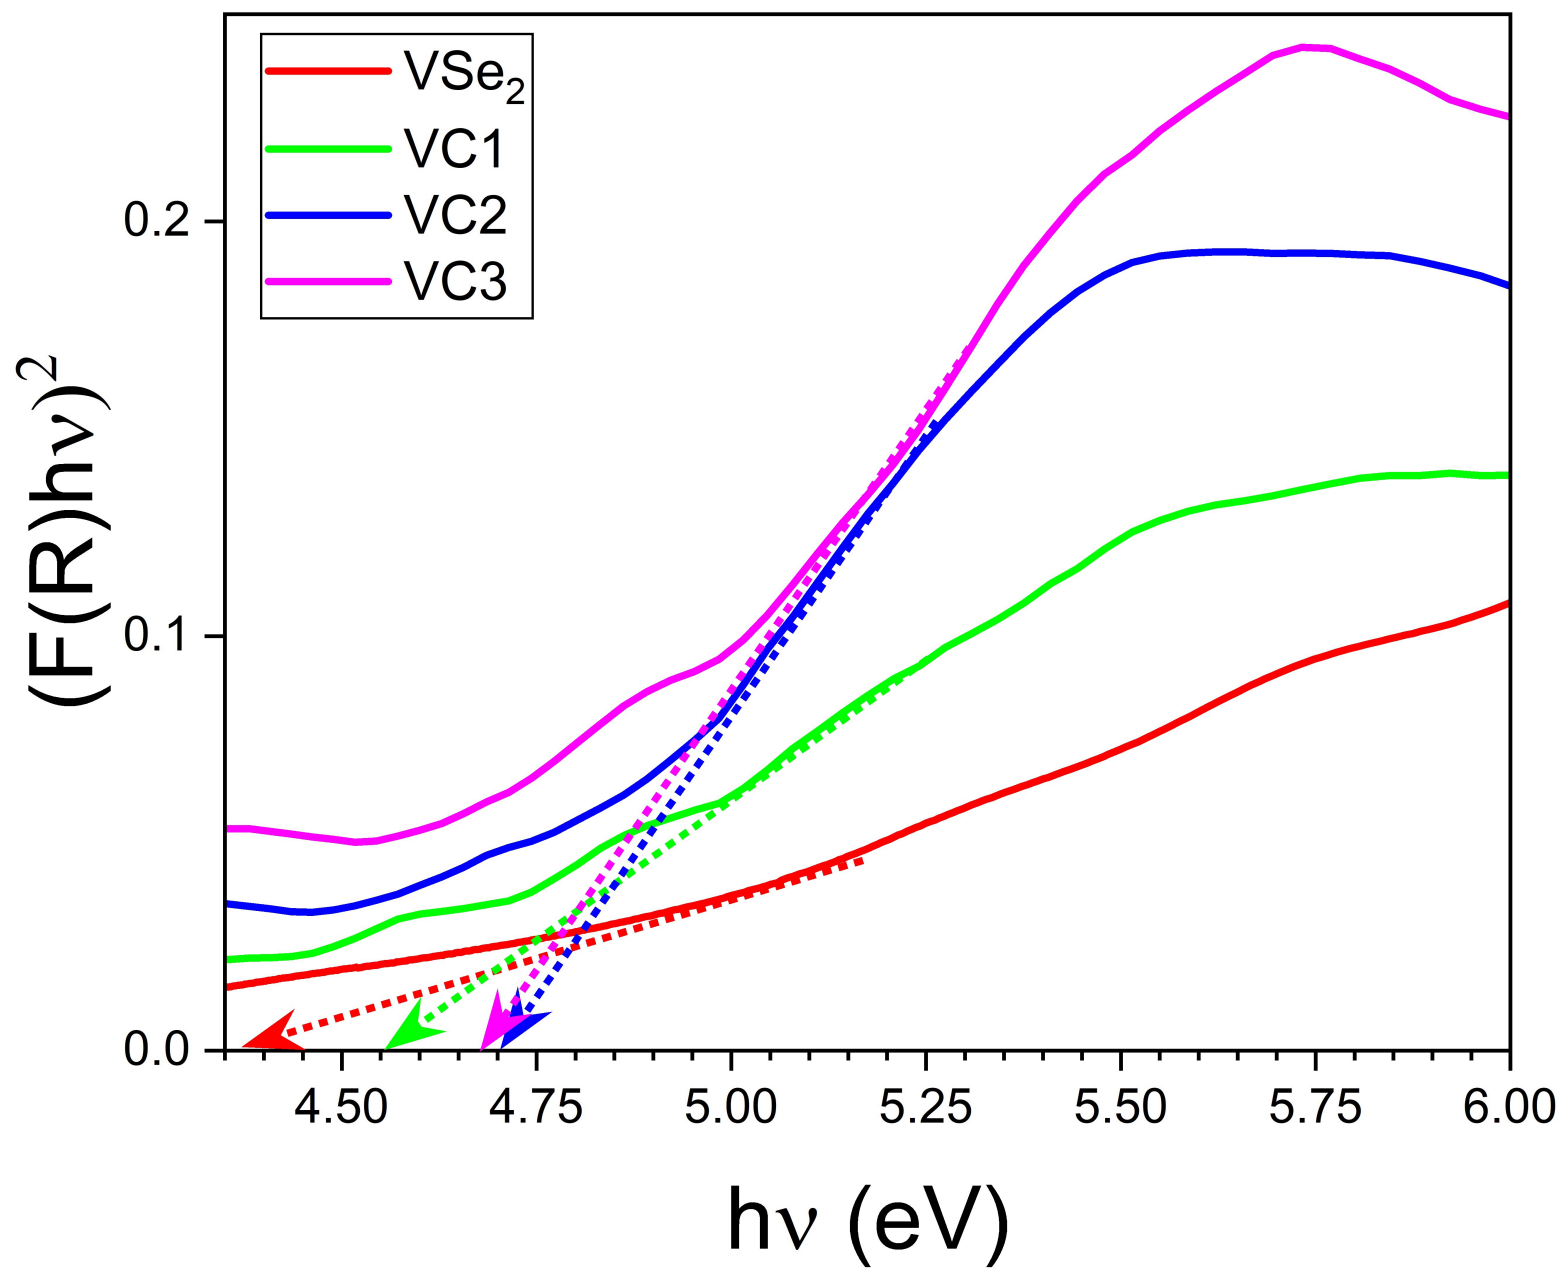

Supplement: d4ra04192e2.pdf [file d4ra04192e2.pdf]

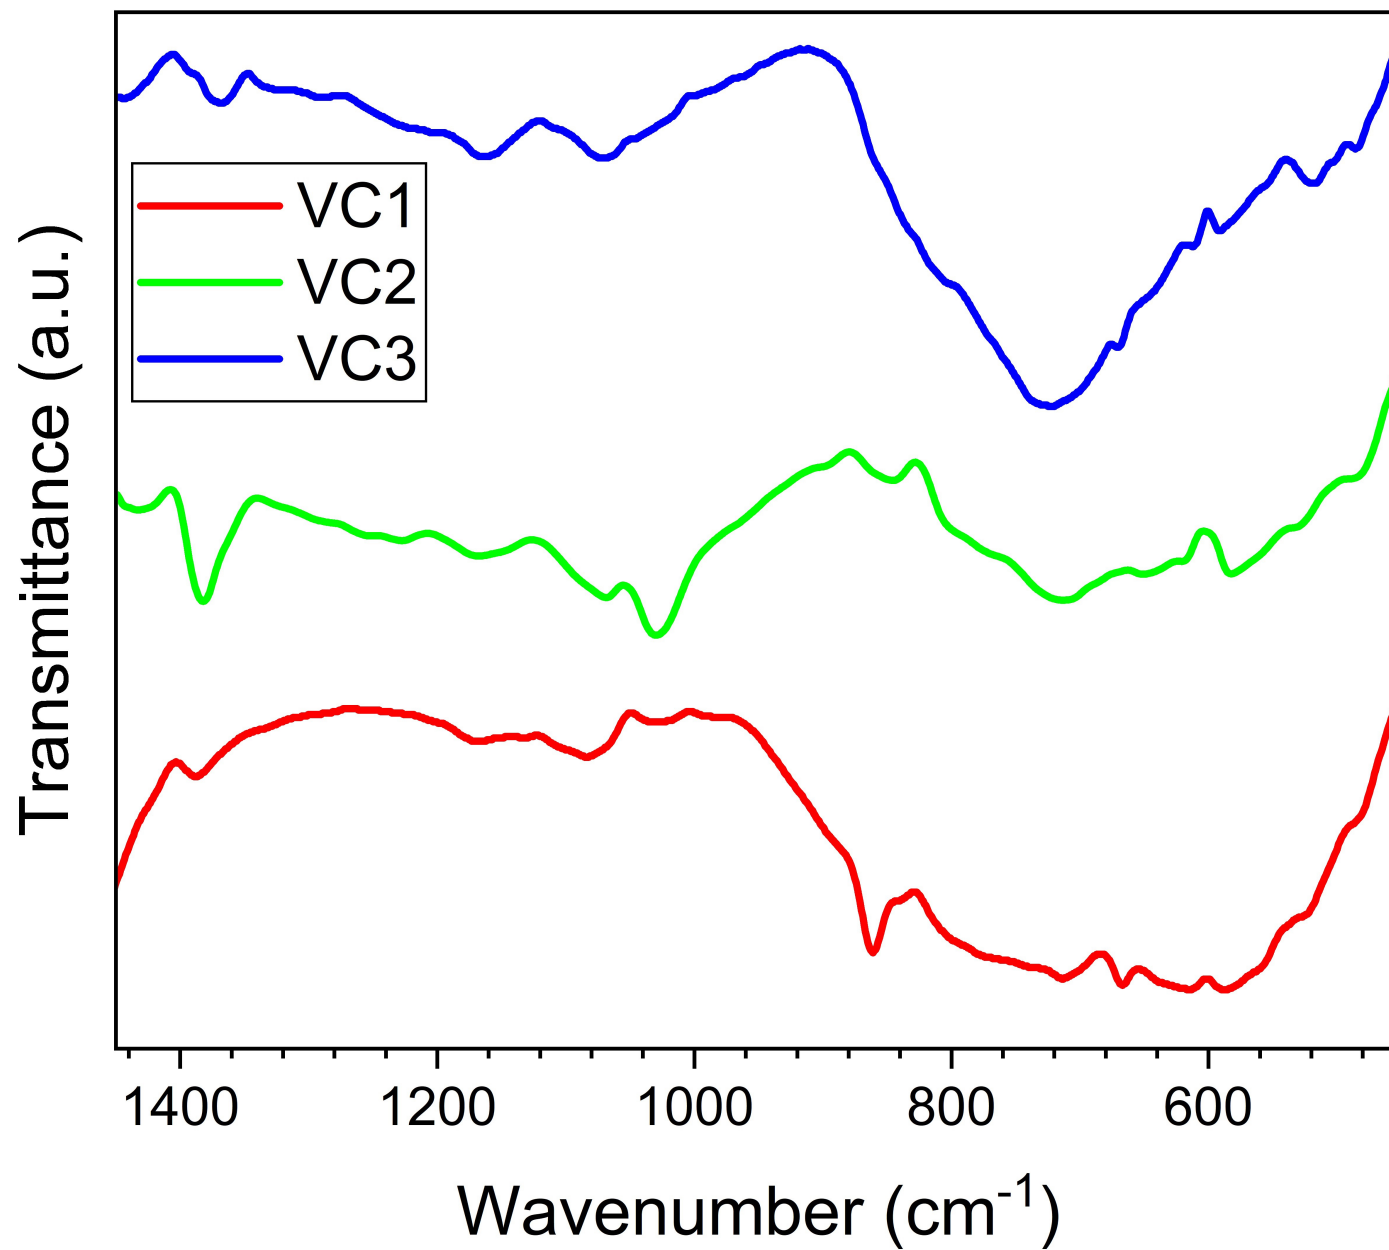

Supplement: d4ra04192e3.pdf [file d4ra04192e3.pdf]

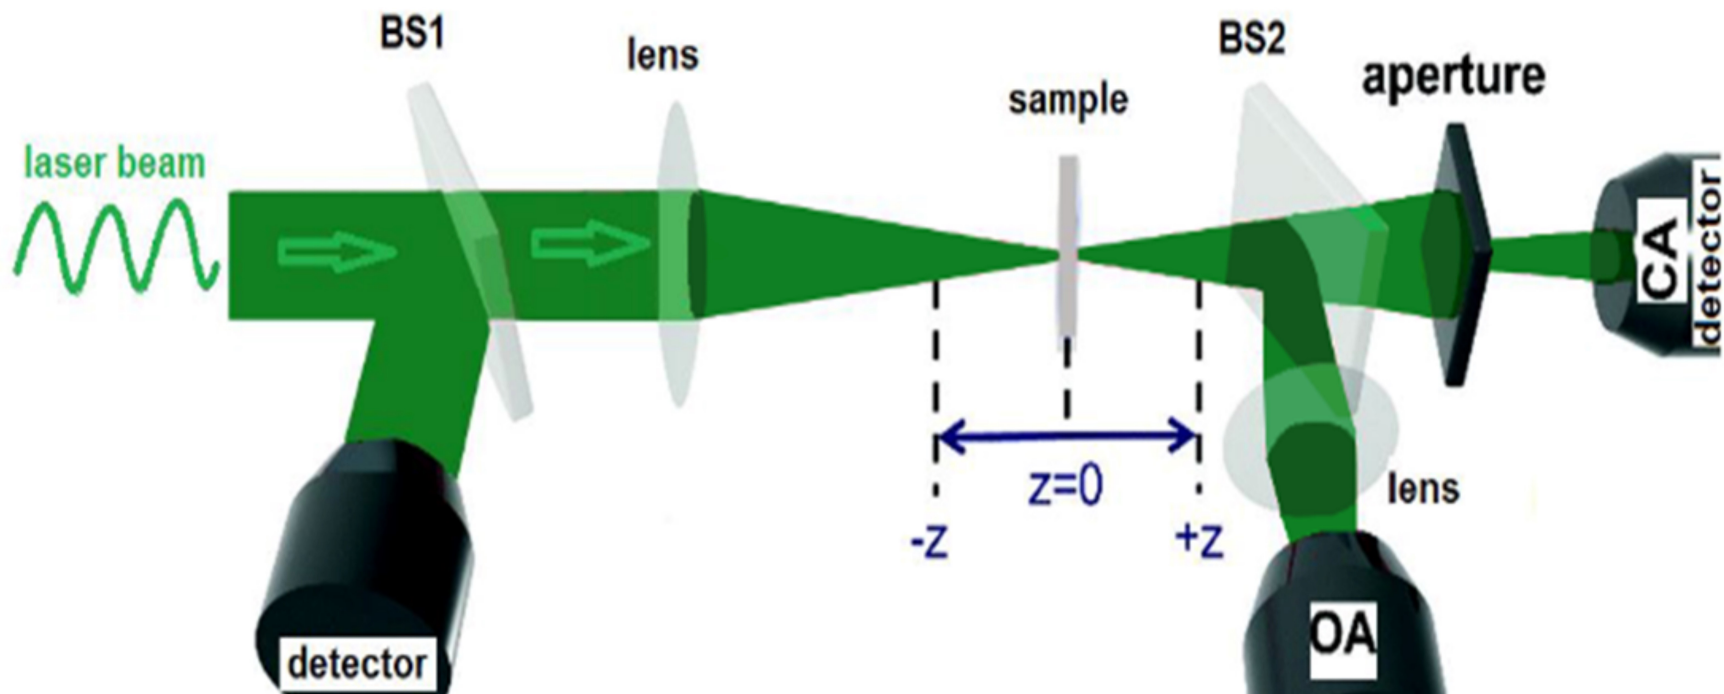

Supplement: d4ra04192e4.pdf [file d4ra04192e4.pdf]

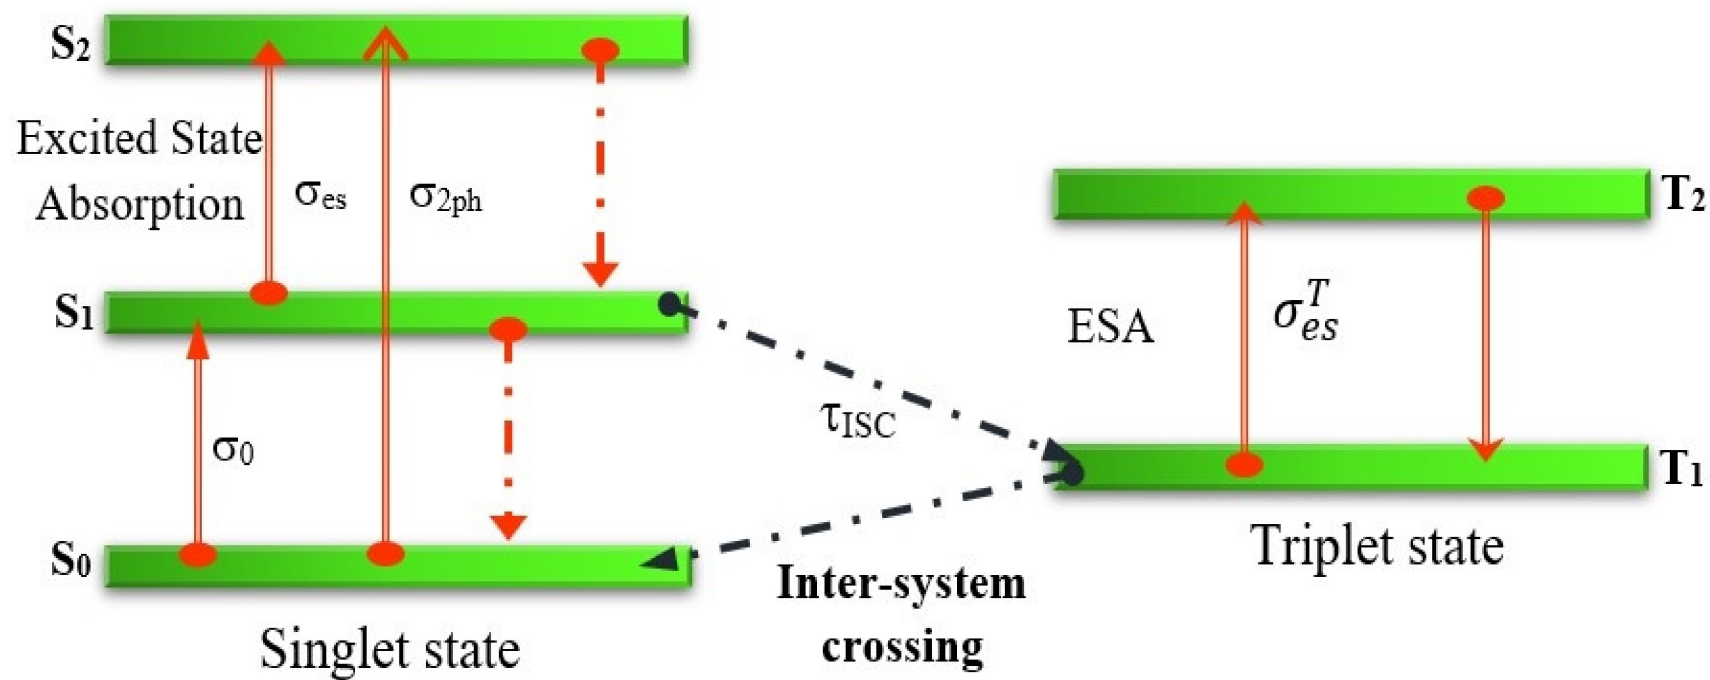

Supplement: d4ra04192e5.pdf [file d4ra04192e5.pdf]
